# Supplementary material
Source: publisher figshare collection journal article supplement (https://acs.figshare.com/ndownloader/files/4948933)
Supplement: Supplementary file 1 [file 4948933]

data_global 
_audit_creation_date        "12-11-09"
_audit_creation_method CRYSTALS_ver_14.23

_oxford_structure_analysis_title  'jps081112_0ma in Pbca'
_chemical_name_systematic         ?
_chemical_melting_point           ?

#looking for refcif 
 
 
# Check this file using the IUCr facility at: 
# http://checkcif.iucr.org/ 
 
# The content below is held in the file 'script/refcif.dat'. This is a text 
# file which you may edit to reflect local conditions. 
# Items which need looking at are represented by a '?'. 
# Items for which there are choices are prefixed with 'choose from'. 
 
_publ_contact_letter 
; 
; 
_publ_contact_author_name         '' 
_publ_contact_author_address 
; 
; 
 
_publ_contact_author_phone        '' 
_publ_contact_author_fax          '' 
_publ_contact_author_email        '' 
_publ_requested_journal           '' 
_publ_requested_category          EO # choose from: FI FM FO CI CM CO AD 
_publ_requested_coeditor_name     '' 
 
_publ_section_title 
# Title of paper - generally just the systematic or trivial name 
; ? 
; 
 
# The loop structure below should contain the names and addresses of all 
# authors, in the required order of publication. Repeat as necessary. 
loop_ 
 _publ_author_name 
 _publ_author_address 
 _publ_author_footnote 
 'Other, Anthony N.' # Author 1 
; 
 ? # Address for author 1 
; 
; 
 ? # Footnote for author 1 
; 
 'Else, S. O.' # Author 2 
; 
 ? # Address 2 
; 
; 
 ? # Footnote 2 
; 
 
 
_publ_section_abstract 
# Text of the abstract 
# (a) The Abstract must be self-contained and comprehensible 
# without the rest of the paper. This means no references 
# to atom names or to compound numbers; compounds must be 
# identified as the title compound, or by name or by some other 
# means such as derivatives of each other (e.g. "the 
# corresponding ketone"). 
# (b) The chemical formula of "the title compound" must be given. 
# (c) Any crystallographic molecular symmetry should be 
# mentioned, and also the presence of more than one molecule 
# in the asymmetric unit (i.e. anything other than Z'=1). 
; 
? 
; 
 
_publ_section_related_literature  # Not in version 2.3.1 
############################################################### 
# Essential references (e.g. to the origin of the material studied, related 
# structural studies, and to information supporting the reported structure) 
# should be cited in this section, with appropriate very brief explanatory 
# text, for example `The synthesis of the complex is described by Jones 
# (2001). The anhydrous complex has essentially the same coordination 
# geometry (Smith, 2003).' In addition, all references included in the 
# supplementary materials, but not elsewhere in the published article, 
# should be given here. The simple text `For related literature, see:...' 
# may be used, but further details should be provided in the Comment 
# section, which forms part of the supplementary material. 
############################################################### 
; 
? 
; 
 
_publ_section_comment 
# Text of the paper 
# Note that atoms are referenced as N2, not N(2) or N~2~ 
# If text containing () occur within (), the outer ones should be [] 
# Figures should be referenced as Fig. 
; 
? 
; 
_publ_section_acknowledgements    # Acknowledgments 
; 
? 
; 
_publ_section_figure_captions 
# Captions to figures - Start each caption on a new line after a blank line 
; 
; 
 
 
_publ_section_exptl_refinement 
# Some potentially useful phrases are donated by Bill Clegg: 
; 

The H atoms were all located in a difference map, but those 
attached to carbon atoms were repositioned geometrically. 
The H atoms were initially refined with soft restraints on the 
bond lengths and angles to regularise their geometry 
(C---H in the range 0.93--0.98, 
N---H in the range 0.86--0.89 
N---H to 0.86 
O---H = 0.82 
\%A) 
and 
U~iso~(H) (in the range 1.2-1.5 times U~eq~ of the parent atom), 
after which the positions were refined with riding constraints 
(Cooper et al, 2010). 
 
Cooper, R. I., Thompson, A. L. & Watkin, D. J. (2010). J. Appl. Cryst. 
43, 1100-1107. 

Hydrogen atoms could not be located on methanol and water molecules
 
; 
 
_publ_section_exptl_prep 
# Brief details or a reference. Include solvent if known 
; 
? 
; 
 
# Hand-made tables can be put in the cif. The number of columns 
# is set in the loop header. 
# The contants of each column can either be a piece of text 
# without any spaces (eg a number) or other text enclosed in " " 
# Remove the leading # in the following example 
 
#geom_extra_table_head_A 
#; 
#Table 2. 
#Molecular parameters deviating most from MOGUL averages 
#; 
# 
#loop_ 
#_geom_extra_tableA_col_1 
#_geom_extra_tableA_col_2 
#_geom_extra_tableA_col_3 
#_geom_extra_tableA_col_4 
# 
#Parameter "Observed Value" "MOGUL Value" "MOGUL e.s.d" 
#N5-C6-C4 129 124 "7 (\%)" 
#C3-O10-C2 105 109 "2 (\%)" 
#C6-O7 1.25 1.22 ".02 (\%A)" 
# 
 
data_1 
 
_exptl_special_details 
; 
 The crystal was 
placed in the cold stream of an Oxford 
Cryosystems open-flow nitrogen cryostat (Cosier & 
Glazer, 1986) with a nominal stability of 0.1K. 
 
Cosier, J. & Glazer, A.M., 1986. J. Appl. Cryst. 105-107. 
; 
_refine_special_details 
; 
? 
; 
#--------------------------------------------------------------- 
# _oxford_ data items, April 2010: 
# There is some uncertainty about the correct way of forming local data 
# names, e.g. 
 
# _atom_site_special_shape_oxford 
# or 
# _oxford_atom_site_special_shape 
 
# see: 
# http://www.iucr.org/resources/cif/spec/version1.1/semantics#namespace 
 
# A reserved prefix, e.g. foo, must be used in the following way 
# " If the data file contains items defined in a DDL1 dictionary, the 
# local data names assigned under the reserved prefix must contain it as 
# their first component, e.g. _foo_atom_site_my_item. " 
 
# However, this seems to say the opposite: 
# http://www.iucr.org/__data/iucr/cif/standard/cifstd8.html 
 
# According to advice from the IUCr, CRYSTALS is correct 
#--------------------------------------------------------------- 
# End of 'script/refcif.dat' 
#end of refcif 
_cell_length_a                    18.6397(5)
_cell_length_b                    12.4461(3)
_cell_length_c                    30.7444(9)
_cell_angle_alpha                 90
_cell_angle_beta                  90
_cell_angle_gamma                 90
_cell_volume                      7132.4(3)
 
_symmetry_cell_setting            'orthorhombic' 
_symmetry_space_group_name_H-M    'P b c a ' 
_symmetry_space_group_name_Hall   '-P 2ac 2ab '
loop_
 _symmetry_equiv_pos_as_xyz
 'x,y,z'
 '-x,-y,-z'
 'x,-y+1/2,z+1/2'
 '-x,y+1/2,-z+1/2'
 '-x+1/2,-y,z+1/2'
 'x+1/2,y,-z+1/2'
 'x+1/2,-y+1/2,-z'
 '-x+1/2,y+1/2,z'

loop_
_atom_type_symbol
_atom_type_scat_dispersion_real
_atom_type_scat_dispersion_imag
_atom_type_scat_Cromer_Mann_a1
_atom_type_scat_Cromer_Mann_b1
_atom_type_scat_Cromer_Mann_a2
_atom_type_scat_Cromer_Mann_b2
_atom_type_scat_Cromer_Mann_a3
_atom_type_scat_Cromer_Mann_b3
_atom_type_scat_Cromer_Mann_a4
_atom_type_scat_Cromer_Mann_b4
_atom_type_scat_Cromer_Mann_c
_atom_type_scat_source  
 C       0.0033   0.0016   2.3100  20.8439   1.0200  10.2075   1.5886   0.5687
   0.8650  51.6512   0.2156 'International Tables Vol C 4.2.6.8 and 6.1.1.4'
 H       0.0000   0.0000   0.4930  10.5109   0.3229  26.1257   0.1402   3.1424
   0.0408  57.7998   0.0030 'International Tables Vol C 4.2.6.8 and 6.1.1.4'
 N       0.0061   0.0033  12.2126   0.0057   3.1322   9.8933   2.0125  28.9975
   1.1663   0.5826 -11.5290 'International Tables Vol C 4.2.6.8 and 6.1.1.4'
 O       0.0106   0.0060   3.0485  13.2771   2.2868   5.7011   1.5463   0.3239
   0.8670  32.9089   0.2508 'International Tables Vol C 4.2.6.8 and 6.1.1.4'
 Dy     -0.1892   4.4098  26.5070   2.1802  17.6383   0.2022  14.5596  12.1899
   2.9658 111.8740   4.2973 'International Tables Vol C 4.2.6.8 and 6.1.1.4'
 Zn      0.2839   1.4301  14.0743   3.2655   7.0318   0.2333   5.1652  10.3163
   2.4100  58.7097   1.3041 'International Tables Vol C 4.2.6.8 and 6.1.1.4'
 Br     -0.2901   2.4595  17.1789   2.1723   5.2358  16.5796   5.6377   0.2609
   3.9851  41.4328   2.9557 'International Tables Vol C 4.2.6.8 and 6.1.1.4'
 
 
_cell_formula_units_Z                    8

_chemical_formula_sum             'C29.50 H35 Br1 Dy1 N3 O12.50 Zn1'
_chemical_formula_moiety          'C29 H31 Br Dy N3 O11 Zn, 0.5(C H4 O), H2 O '
_chemical_compound_source                ?
_chemical_formula_weight            939.39
 
 
_cell_measurement_reflns_used         9301
_cell_measurement_theta_min              3
_cell_measurement_theta_max             29
_cell_measurement_temperature          180
 
_exptl_crystal_description        'block' 
_exptl_crystal_colour             'yellow' 
_exptl_crystal_size_min           0.200 
_exptl_crystal_size_mid           0.200 
_exptl_crystal_size_max           0.250 
 
_exptl_crystal_density_diffrn     1.750 
_exptl_crystal_density_meas       ? 
_exptl_crystal_density_method     'not measured' 
# Non-dispersive F(000): 
_exptl_crystal_F_000              3680 
_exptl_absorpt_coefficient_mu     3.935 
 
# Sheldrick geometric approximatio 0.46 0.46 
_exptl_absorpt_correction_type    multi-scan 
_exptl_absorpt_process_details    'SADABS (Siemens, 1996)' 
_exptl_absorpt_correction_T_min   0.33 
_exptl_absorpt_correction_T_max   0.46 
_diffrn_measurement_device_type   'Bruker Kappa Apex2' 
_diffrn_measurement_device        'Area' 
_diffrn_radiation_monochromator   'graphite' 
_diffrn_radiation_type            'Mo K\a'
_diffrn_radiation_wavelength           0.71073
_diffrn_measurement_method        '\f & \w scans' 
 
# If a reference occurs more than once, delete the author 
# and date from subsequent references. 
_computing_data_collection        'Apex2 (Bruker AXS, 2006)' 
_computing_cell_refinement        'Apex2 (Bruker AXS, 2006)' 
_computing_data_reduction         'Apex2 (Bruker AXS, 2006)' 
_computing_structure_solution     'Superflip (Palatinus & Chapuis, 2007)' 
_computing_structure_refinement   'CRYSTALS (Betteridge et al., 2003)' 
_computing_publication_material   'CRYSTALS (Betteridge et al., 2003)' 
_computing_molecular_graphics     'CAMERON (Watkin et al., 1996)' 
 
_diffrn_standards_interval_time   . 
_diffrn_standards_interval_count  . 
_diffrn_standards_number          0 
_diffrn_standards_decay_%         ? 
 
_diffrn_ambient_temperature        180
_diffrn_reflns_number             131903 
_reflns_number_total              9485 
_diffrn_reflns_av_R_equivalents   0.027 
# Number of reflections without Friedels Law is 0 
# Number of reflections with Friedels Law is 9485 
# Theoretical number of reflections is about 19010 
 
 
_diffrn_reflns_theta_min          2.076 
_diffrn_reflns_theta_max          29.025 
_diffrn_measured_fraction_theta_max 0.999 
 
_diffrn_reflns_theta_full         29.025 
_diffrn_measured_fraction_theta_full 0.999 
 
 
_diffrn_reflns_limit_h_min        -25 
_diffrn_reflns_limit_h_max        25 
_diffrn_reflns_limit_k_min        -16 
_diffrn_reflns_limit_k_max        16 
_diffrn_reflns_limit_l_min        -41 
_diffrn_reflns_limit_l_max        41 
_reflns_limit_h_min               0 
_reflns_limit_h_max               25 
_reflns_limit_k_min               0 
_reflns_limit_k_max               16 
_reflns_limit_l_min               0 
_reflns_limit_l_max               41 
 
_atom_sites_solution_primary      Other  #heavy,direct,difmap,geom
# _atom_sites_solution_secondary  difmap
_atom_sites_solution_hydrogens    difmap
 
_refine_diff_density_min          -2.57 
_refine_diff_density_max          1.49 
 
 
# The current dictionary definitions do not cover the 
# situation where the reflections used for refinement were 
# selected by a user-defined sigma threshold 
 
 
# The values actually used during refinement 
_oxford_reflns_threshold_expression_ref     I>3.0\s(I)
_refine_ls_number_reflns          7797 
_refine_ls_number_restraints      0 
_refine_ls_number_parameters      442 
_oxford_refine_ls_R_factor_ref    0.0407 
_refine_ls_wR_factor_ref          0.0392 
_refine_ls_goodness_of_fit_ref    1.0184 
_refine_ls_shift/su_max           0.0041334 
_refine_ls_shift/su_mean          0.0000568 
 
 
# The values computed from all data 
_oxford_reflns_number_all         9458 
_refine_ls_R_factor_all           0.0505 
_refine_ls_wR_factor_all          0.0531 
 
# The values computed with a 2 sigma cutoff - a la SHELX 
_reflns_threshold_expression      I>2.0\s(I)
_reflns_number_gt                 8394 
_refine_ls_R_factor_gt            0.0441 
_refine_ls_wR_factor_gt           0.0412 
 
# choose from: rm (reference molecule of known chirality), 
# ad (anomolous dispersion - Flack), rmad (rm and ad), 
# syn (from synthesis), unk (unknown) or . (not applicable). 
_chemical_absolute_configuration  '.' 
 
 
_refine_ls_structure_factor_coef  F 
_refine_ls_matrix_type            full
_refine_ls_hydrogen_treatment     constr         # none, undef, noref, refall,
                                                 # refxyz, refU, constr or mixed
_refine_ls_weighting_scheme       calc 
_refine_ls_weighting_details 
;
 Method, part 1, Chebychev polynomial, (Watkin, 1994, Prince, 1982) 
 [weight] = 1.0/[A~0~*T~0~(x)+A~1~*T~1~(x) ... +A~n-1~]*T~n-1~(x)] 
 where A~i~ are the Chebychev coefficients listed below and x= Fcalc/Fmax 
 Method = Robust Weighting (Prince, 1982) 
 W = [weight] * [1-(deltaF/6*sigmaF)^2^]^2^ 
 A~i~ are: 
 0.200 0.165 0.779E-01 
;
# Insert your own references if required - in alphabetical order 
_publ_section_references 
; 
Siemens Industrial Automation, Inc (1996). 
SADABS: Area-Detector Absorption Correction;: Madison, WI. 
 
Bruker Analytical X-ray Systems, Inc., 2006. <i>Apex2</i>, 
Version 2 User Manual, M86-E01078, Madison, WI. 
 
Betteridge, P.W., Carruthers, J.R., Cooper, R.I., 
Prout, K. & Watkin, D.J. (2003). J. Appl. Cryst. 36, 1487. 
 
Watkin, D.J., Prout, C.K. & Pearce, L.J. (1996). CAMERON, Chemical 
Crystallography Laboratory, Oxford, UK. 
 
Palatinus, L. & Chapuis, G. (2007). J. Appl. Cryst. 40, 786-790. 
 
Watkin D.J. (1994). 
Acta Cryst, A50, 411-437. 
 
Prince, E. 
Mathematical Techniques in Crystallography 
and Materials Science 
Springer-Verlag, New York, 1982. 
; 

# Uequiv = arithmetic mean of Ui i.e. Ueqiv = (U1+U2+U3)/3

# Replace last . with number of unfound hydrogen atoms attached to an atom.

# ..._refinement_flags_... 
# . no refinement constraints           S special position constraint on site
# G rigid group refinement of site      R riding atom
# D distance or angle restraint on site T thermal displacement constraints
# U Uiso or Uij restraint (rigid bond)  P partial occupancy constraint


loop_
_atom_site_label
_atom_site_type_symbol
_atom_site_fract_x
_atom_site_fract_y
_atom_site_fract_z
_atom_site_U_iso_or_equiv
_atom_site_occupancy
_atom_site_adp_type
_atom_site_refinement_flags_posn
_atom_site_refinement_flags_adp
_atom_site_refinement_flags_occupancy
_atom_site_disorder_assembly
_atom_site_disorder_group
_atom_site_attached_hydrogens
Dy1 Dy 0.501313(8) 0.269777(11) 0.610945(5) 0.0214 1.0000 Uani . . . . . . 
Zn1 Zn 0.441212(18) -0.00101(3) 0.607524(12) 0.0202 1.0000 Uani . . . . . . 
Br1 Br 0.50469(2) -0.06154(3) 0.674881(14) 0.0415 1.0000 Uani . . . . . . 
C1 C 0.6945(2) 0.2802(4) 0.6039(2) 0.0529 1.0000 Uani . . . . . . 
C2 C 0.64349(17) 0.1239(3) 0.57121(11) 0.0231 1.0000 Uani . . . . . . 
C3 C 0.70802(18) 0.0914(3) 0.55370(13) 0.0300 1.0000 Uani . . . . . . 
C4 C 0.71091(18) -0.0033(3) 0.52945(13) 0.0322 1.0000 Uani . . . . . . 
C5 C 0.65043(19) -0.0644(3) 0.52378(12) 0.0286 1.0000 Uani . . . . . . 
C6 C 0.58453(17) -0.0335(3) 0.54272(11) 0.0217 1.0000 Uani . . . . . . 
C7 C 0.58003(16) 0.0627(3) 0.56618(11) 0.0206 1.0000 Uani . . . . . . 
C8 C 0.52311(18) -0.1040(3) 0.53580(11) 0.0231 1.0000 Uani . . . . . . 
C9 C 0.4084(2) -0.1781(3) 0.54017(12) 0.0313 1.0000 Uani . . . . . . 
C10 C 0.36120(19) -0.2286(3) 0.57530(12) 0.0277 1.0000 Uani . . . . . . 
C11 C 0.30683(19) -0.1481(3) 0.59280(15) 0.0352 1.0000 Uani . . . . . . 
C12 C 0.29144(19) -0.0027(3) 0.63922(14) 0.0340 1.0000 Uani . . . . . . 
C13 C 0.29989(19) 0.0976(3) 0.66245(14) 0.0334 1.0000 Uani . . . . . . 
C14 C 0.35820(17) 0.1675(3) 0.65664(11) 0.0233 1.0000 Uani . . . . . . 
C15 C 0.2439(3) 0.1280(4) 0.69098(18) 0.0512 1.0000 Uani . . . . . . 
C16 C 0.2449(3) 0.2240(4) 0.71270(17) 0.0508 1.0000 Uani . . . . . . 
C17 C 0.3027(2) 0.2930(4) 0.70765(13) 0.0372 1.0000 Uani . . . . . . 
C18 C 0.35876(18) 0.2649(3) 0.68062(11) 0.0258 1.0000 Uani . . . . . . 
C19 C 0.4233(3) 0.4249(5) 0.6970(2) 0.0638 1.0000 Uani . . . . . . 
C20 C 0.4062(2) -0.2802(3) 0.61106(14) 0.0374 1.0000 Uani . . . . . . 
C21 C 0.3160(2) -0.3156(3) 0.55200(15) 0.0409 1.0000 Uani . . . . . . 
C22 C 0.5689(2) 0.4640(3) 0.54733(12) 0.0310 1.0000 Uani . . . . . . 
C23 C 0.58104(17) 0.5385(3) 0.58200(11) 0.0245 1.0000 Uani . . . . . . 
C24 C 0.60068(19) 0.6451(3) 0.57106(13) 0.0298 1.0000 Uani . . . . . . 
C25 C 0.6129(2) 0.7190(3) 0.60285(14) 0.0341 1.0000 Uani . . . . . . 
C26 C 0.6072(2) 0.6899(3) 0.64688(14) 0.0324 1.0000 Uani . . . . . . 
C27 C 0.58859(19) 0.5873(3) 0.65802(12) 0.0276 1.0000 Uani . . . . . . 
C28 C 0.57435(17) 0.5075(3) 0.62581(11) 0.0235 1.0000 Uani . . . . . . 
C29 C 0.5857(4) 0.6291(5) 0.73380(17) 0.0721 1.0000 Uani . . . . . . 
N1 N 0.46294(15) -0.1011(2) 0.55560(9) 0.0216 1.0000 Uani . . . . . . 
N2 N 0.33629(15) -0.0511(2) 0.61474(10) 0.0261 1.0000 Uani . . . . . . 
N3 N 0.38631(16) 0.3507(3) 0.55568(10) 0.0297 1.0000 Uani . . . . . . 
O1 O 0.51979(12) 0.10064(19) 0.58277(8) 0.0225 1.0000 Uani . . . . . . 
O2 O 0.41164(12) 0.14803(19) 0.62979(8) 0.0240 1.0000 Uani . . . . . . 
O3 O 0.63241(13) 0.2175(2) 0.59417(10) 0.0325 1.0000 Uani . . . . . . 
O4 O 0.41937(14) 0.3259(2) 0.67400(9) 0.0317 1.0000 Uani . . . . . . 
O5 O 0.54772(15) 0.3697(2) 0.54986(9) 0.0342 1.0000 Uani . . . . . . 
O6 O 0.55741(14) 0.41067(19) 0.63871(8) 0.0277 1.0000 Uani . . . . . . 
O7 O 0.58115(18) 0.5514(2) 0.70007(9) 0.0390 1.0000 Uani . . . . . . 
O8 O 0.41644(14) 0.2619(2) 0.54776(9) 0.0313 1.0000 Uani . . . . . . 
O9 O 0.40732(17) 0.3996(3) 0.58938(10) 0.0409 1.0000 Uani . . . . . . 
O10 O 0.33998(16) 0.3871(3) 0.53182(10) 0.0446 1.0000 Uani . . . . . . 
O11 O 0.55246(16) 0.1956(2) 0.67571(9) 0.0368 1.0000 Uani . . . . . . 
O12 O 0.5973(3) 0.3419(4) 0.73476(18) 0.0929 1.0000 Uani . . . . . . 
O13 O 0.7233(5) -0.0022(10) 0.6799(3) 0.0836 0.5000 Uani . . . . . . 
C30 C 0.6636(8) -0.004(2) 0.7066(5) 0.0955 0.2500 Uani . . . . . . 
C31 C 0.6772(8) -0.048(2) 0.7035(5) 0.0955 0.2500 Uani . . . . . . 
H11 H 0.6805 0.3401 0.6207 0.0799 1.0000 Uiso R . . . . . 
H12 H 0.7284 0.2377 0.6196 0.0798 1.0000 Uiso R . . . . . 
H13 H 0.7150 0.3036 0.5768 0.0800 1.0000 Uiso R . . . . . 
H31 H 0.7490 0.1321 0.5575 0.0349 1.0000 Uiso R . . . . . 
H41 H 0.7542 -0.0251 0.5172 0.0377 1.0000 Uiso R . . . . . 
H51 H 0.6525 -0.1266 0.5076 0.0339 1.0000 Uiso R . . . . . 
H81 H 0.5286 -0.1557 0.5146 0.0269 1.0000 Uiso R . . . . . 
H91 H 0.4334 -0.2353 0.5250 0.0371 1.0000 Uiso R . . . . . 
H92 H 0.3774 -0.1402 0.5200 0.0371 1.0000 Uiso R . . . . . 
H111 H 0.2763 -0.1854 0.6135 0.0410 1.0000 Uiso R . . . . . 
H112 H 0.2783 -0.1234 0.5686 0.0410 1.0000 Uiso R . . . . . 
H121 H 0.2475 -0.0366 0.6428 0.0395 1.0000 Uiso R . . . . . 
H151 H 0.2057 0.0805 0.6948 0.0599 1.0000 Uiso R . . . . . 
H161 H 0.2066 0.2423 0.7305 0.0590 1.0000 Uiso R . . . . . 
H171 H 0.3040 0.3581 0.7220 0.0449 1.0000 Uiso R . . . . . 
H191 H 0.4709 0.4515 0.6970 0.0929 1.0000 Uiso R . . . . . 
H192 H 0.4094 0.4137 0.7260 0.0930 1.0000 Uiso R . . . . . 
H193 H 0.3923 0.4770 0.6842 0.0930 1.0000 Uiso R . . . . . 
H201 H 0.3749 -0.3085 0.6328 0.0548 1.0000 Uiso R . . . . . 
H202 H 0.4376 -0.2284 0.6242 0.0549 1.0000 Uiso R . . . . . 
H203 H 0.4348 -0.3373 0.5991 0.0552 1.0000 Uiso R . . . . . 
H213 H 0.2834 -0.3463 0.5725 0.0619 1.0000 Uiso R . . . . . 
H212 H 0.3468 -0.3713 0.5413 0.0620 1.0000 Uiso R . . . . . 
H211 H 0.2897 -0.2851 0.5283 0.0618 1.0000 Uiso R . . . . . 
H221 H 0.5786 0.4894 0.5196 0.0370 1.0000 Uiso R . . . . . 
H241 H 0.6052 0.6639 0.5421 0.0352 1.0000 Uiso R . . . . . 
H251 H 0.6253 0.7882 0.5953 0.0409 1.0000 Uiso R . . . . . 
H261 H 0.6162 0.7400 0.6683 0.0380 1.0000 Uiso R . . . . . 
H291 H 0.5795 0.5946 0.7616 0.1130 1.0000 Uiso R . . . . . 
H292 H 0.6317 0.6642 0.7321 0.1130 1.0000 Uiso R . . . . . 
H293 H 0.5478 0.6809 0.7293 0.1129 1.0000 Uiso R . . . . . 
loop_
_atom_site_aniso_label
_atom_site_aniso_U_11
_atom_site_aniso_U_22
_atom_site_aniso_U_33
_atom_site_aniso_U_23
_atom_site_aniso_U_13
_atom_site_aniso_U_12
Dy1 0.02270(7) 0.01794(8) 0.02370(8) -0.00597(5) 0.00158(6) -0.00315(6) 
Zn1 0.01686(15) 0.01921(15) 0.02440(16) -0.00256(14) 0.00249(13) -0.00162(13) 
Br1 0.0501(2) 0.0372(2) 0.0371(2) -0.00238(15) -0.01240(19) 0.00559(19) 
C1 0.0255(18) 0.039(2) 0.094(4) -0.026(2) 0.000(2) -0.0118(16) 
C2 0.0210(15) 0.0222(15) 0.0260(15) -0.0009(12) 0.0015(12) -0.0014(12) 
C3 0.0216(16) 0.0310(18) 0.0374(19) 0.0021(15) 0.0033(14) -0.0033(13) 
C4 0.0225(15) 0.0306(17) 0.044(2) 0.0014(16) 0.0102(14) 0.0062(14) 
C5 0.0313(17) 0.0225(16) 0.0319(18) -0.0018(14) 0.0091(14) 0.0039(13) 
C6 0.0206(14) 0.0192(14) 0.0254(15) 0.0011(12) 0.0034(12) 0.0004(11) 
C7 0.0179(13) 0.0202(14) 0.0235(15) 0.0031(12) 0.0028(11) 0.0006(11) 
C8 0.0283(15) 0.0183(14) 0.0226(15) 0.0004(12) 0.0018(12) 0.0002(12) 
C9 0.0328(18) 0.0327(19) 0.0284(17) -0.0074(14) 0.0003(14) -0.0125(15) 
C10 0.0259(15) 0.0232(16) 0.0340(18) -0.0014(14) -0.0010(13) -0.0097(13) 
C11 0.0221(16) 0.033(2) 0.050(2) -0.0062(17) -0.0009(15) -0.0073(14) 
C12 0.0217(15) 0.0306(17) 0.050(2) 0.0024(17) 0.0094(14) -0.0044(14) 
C13 0.0246(16) 0.0359(19) 0.040(2) 0.0012(16) 0.0109(15) 0.0017(14) 
C14 0.0214(14) 0.0260(16) 0.0225(15) 0.0004(12) 0.0025(12) 0.0044(12) 
C15 0.038(2) 0.045(3) 0.070(3) -0.004(2) 0.027(2) -0.0017(19) 
C16 0.044(2) 0.050(3) 0.058(3) -0.004(2) 0.027(2) 0.011(2) 
C17 0.040(2) 0.039(2) 0.0334(19) -0.0046(16) 0.0076(16) 0.0112(17) 
C18 0.0257(15) 0.0280(17) 0.0237(15) 0.0016(13) 0.0023(12) 0.0082(13) 
C19 0.041(2) 0.057(3) 0.093(4) -0.050(3) 0.016(3) -0.007(2) 
C20 0.042(2) 0.0264(19) 0.044(2) 0.0062(16) -0.0021(18) -0.0060(15) 
C21 0.041(2) 0.032(2) 0.050(2) -0.0088(18) -0.0006(18) -0.0163(17) 
C22 0.0313(17) 0.0367(19) 0.0250(16) -0.0008(14) 0.0039(14) -0.0052(15) 
C23 0.0206(14) 0.0256(16) 0.0272(16) -0.0030(13) 0.0028(12) -0.0015(12) 
C24 0.0256(16) 0.0306(18) 0.0332(18) 0.0070(15) 0.0023(14) 0.0012(13) 
C25 0.0322(18) 0.0218(17) 0.048(2) 0.0038(15) 0.0024(16) -0.0017(14) 
C26 0.0341(18) 0.0194(15) 0.044(2) -0.0062(15) -0.0018(16) -0.0017(14) 
C27 0.0292(16) 0.0232(16) 0.0304(17) -0.0034(13) -0.0015(14) -0.0038(13) 
C28 0.0213(14) 0.0204(14) 0.0286(15) -0.0052(13) -0.0014(12) -0.0024(12) 
C29 0.135(6) 0.048(3) 0.033(2) -0.016(2) 0.007(3) -0.026(3) 
N1 0.0235(13) 0.0179(12) 0.0232(13) 0.0005(10) -0.0004(10) -0.0050(10) 
N2 0.0188(12) 0.0236(14) 0.0359(16) 0.0020(12) 0.0007(11) -0.0031(10) 
N3 0.0248(14) 0.0370(17) 0.0272(15) 0.0059(13) 0.0072(11) 0.0019(12) 
O1 0.0190(10) 0.0180(10) 0.0305(12) -0.0048(9) 0.0061(8) -0.0025(8) 
O2 0.0233(11) 0.0215(11) 0.0273(12) -0.0049(9) 0.0061(9) -0.0007(9) 
O3 0.0202(11) 0.0285(13) 0.0489(16) -0.0133(12) 0.0027(11) -0.0052(10) 
O4 0.0332(13) 0.0297(13) 0.0323(13) -0.0119(11) 0.0062(10) -0.0014(10) 
O5 0.0369(14) 0.0381(15) 0.0274(13) -0.0072(11) 0.0042(11) -0.0123(12) 
O6 0.0379(14) 0.0185(11) 0.0267(12) -0.0027(9) -0.0040(10) -0.0075(10) 
O7 0.0617(19) 0.0305(14) 0.0249(13) -0.0052(11) -0.0055(12) -0.0115(13) 
O8 0.0315(12) 0.0294(13) 0.0330(13) -0.0033(11) -0.0034(10) -0.0013(10) 
O9 0.0484(17) 0.0399(16) 0.0345(15) -0.0095(12) 0.0010(13) 0.0143(13) 
O10 0.0339(14) 0.064(2) 0.0358(15) 0.0119(14) 0.0009(12) 0.0118(14) 
O11 0.0471(16) 0.0296(13) 0.0337(14) 0.0040(11) -0.0066(12) -0.0002(12) 
O12 0.119(4) 0.060(3) 0.100(4) -0.011(2) -0.056(3) 0.027(3) 
O13 0.056(5) 0.115(8) 0.080(6) 0.015(6) 0.021(4) 0.016(5) 
C30 0.050(8) 0.18(3) 0.060(8) 0.034(12) -0.007(7) -0.068(13) 
C31 0.050(8) 0.18(3) 0.060(8) 0.034(12) -0.007(7) -0.068(13) 

_refine_ls_extinction_method 
    'None'
loop_
 _geom_bond_atom_site_label_1
 _geom_bond_site_symmetry_1
 _geom_bond_atom_site_label_2
 _geom_bond_site_symmetry_2
 _geom_bond_distance
 _geom_bond_publ_flag
Dy1 . O1 . 2.302(2)    yes
Dy1 . O2 . 2.329(2)    yes
Dy1 . O3 . 2.581(2)    yes
Dy1 . O4 . 2.565(2)    yes
Dy1 . O5 . 2.412(3)    yes
Dy1 . O6 . 2.213(2)    yes
Dy1 . O8 . 2.507(3)    yes
Dy1 . O9 . 2.474(3)    yes
Dy1 . O11 . 2.393(3)    yes
Zn1 . Br1 . 2.5011(5)    yes
Zn1 . N1 . 2.065(3)    yes
Zn1 . N2 . 2.065(3)    yes
Zn1 . O1 . 2.080(2)    yes
Zn1 . O2 . 2.053(2)    yes
C1 . O3 . 1.427(4)    yes
C1 . H11 . 0.944    no
C1 . H12 . 0.955    no
C1 . H13 . 0.961    no
C2 . C3 . 1.379(5)    yes
C2 . C7 . 1.416(4)    yes
C2 . O3 . 1.377(4)    yes
C3 . C4 . 1.395(6)    yes
C3 . H31 . 0.924    no
C4 . C5 . 1.371(5)    yes
C4 . H41 . 0.932    no
C5 . C6 . 1.413(4)    yes
C5 . H51 . 0.922    no
C6 . C7 . 1.400(5)    yes
C6 . C8 . 1.458(5)    yes
C7 . O1 . 1.321(4)    yes
C8 . N1 . 1.277(4)    yes
C8 . H81 . 0.922    no
C9 . C10 . 1.529(5)    yes
C9 . N1 . 1.475(4)    yes
C9 . H91 . 0.970    no
C9 . H92 . 0.971    no
C10 . C11 . 1.524(5)    yes
C10 . C20 . 1.525(5)    yes
C10 . C21 . 1.548(5)    yes
C11 . N2 . 1.488(5)    yes
C11 . H111 . 0.974    no
C11 . H112 . 0.964    no
C12 . C13 . 1.447(6)    yes
C12 . N2 . 1.276(5)    yes
C12 . H121 . 0.928    no
C13 . C14 . 1.403(5)    yes
C13 . C15 . 1.415(6)    yes
C14 . C18 . 1.418(5)    yes
C14 . O2 . 1.316(4)    yes
C15 . C16 . 1.369(7)    yes
C15 . H151 . 0.933    no
C16 . C17 . 1.387(7)    yes
C16 . H161 . 0.927    no
C17 . C18 . 1.380(5)    yes
C17 . H171 . 0.923    no
C18 . O4 . 1.376(4)    yes
C19 . O4 . 1.423(5)    yes
C19 . H191 . 0.948    no
C19 . H192 . 0.937    no
C19 . H193 . 0.955    no
C20 . H201 . 0.954    no
C20 . H202 . 0.961    no
C20 . H203 . 0.960    no
C21 . H213 . 0.955    no
C21 . H212 . 0.958    no
C21 . H211 . 0.957    no
C22 . C23 . 1.431(5)    yes
C22 . O5 . 1.241(5)    yes
C22 . H221 . 0.926    no
C23 . C24 . 1.416(5)    yes
C23 . C28 . 1.407(5)    yes
C24 . C25 . 1.362(6)    yes
C24 . H241 . 0.925    no
C25 . C26 . 1.405(6)    yes
C25 . H251 . 0.921    no
C26 . C27 . 1.367(5)    yes
C26 . H261 . 0.923    no
C27 . C28 . 1.427(5)    yes
C27 . O7 . 1.375(5)    yes
C28 . O6 . 1.308(4)    yes
C29 . O7 . 1.421(5)    yes
C29 . H291 . 0.964    no
C29 . H292 . 0.963    no
C29 . H293 . 0.967    no
N3 . O8 . 1.263(4)    yes
N3 . O9 . 1.264(4)    yes
N3 . O10 . 1.220(4)    yes
O13 . C30 . 1.383(17)    yes
O13 . C31 . 1.262(14)    yes
loop_
 _geom_angle_atom_site_label_1
 _geom_angle_site_symmetry_1
 _geom_angle_atom_site_label_2
 _geom_angle_site_symmetry_2
 _geom_angle_atom_site_label_3
 _geom_angle_site_symmetry_3
 _geom_angle
 _geom_angle_publ_flag
O1 . Dy1 . O2 . 66.80(8)    yes
O1 . Dy1 . O3 . 63.43(8)    yes
O2 . Dy1 . O3 . 124.41(8)    yes
O1 . Dy1 . O4 . 128.49(8)    yes
O2 . Dy1 . O4 . 64.01(8)    yes
O3 . Dy1 . O4 . 141.58(9)    yes
O1 . Dy1 . O5 . 97.16(9)    yes
O2 . Dy1 . O5 . 141.83(9)    yes
O3 . Dy1 . O5 . 68.58(10)    yes
O4 . Dy1 . O5 . 131.42(9)    yes
O1 . Dy1 . O6 . 143.04(9)    yes
O2 . Dy1 . O6 . 139.34(9)    yes
O3 . Dy1 . O6 . 80.18(9)    yes
O4 . Dy1 . O6 . 76.94(9)    yes
O5 . Dy1 . O6 . 73.89(9)    yes
O1 . Dy1 . O8 . 76.52(9)    yes
O2 . Dy1 . O8 . 73.41(9)    yes
O3 . Dy1 . O8 . 115.64(9)    yes
O4 . Dy1 . O8 . 102.74(9)    yes
O5 . Dy1 . O8 . 69.10(9)    yes
O1 . Dy1 . O9 . 127.04(9)    yes
O2 . Dy1 . O9 . 89.05(10)    yes
O3 . Dy1 . O9 . 141.41(10)    yes
O4 . Dy1 . O9 . 66.61(9)    yes
O5 . Dy1 . O9 . 73.06(10)    yes
O1 . Dy1 . O11 . 84.31(9)    yes
O2 . Dy1 . O11 . 80.09(9)    yes
O3 . Dy1 . O11 . 72.05(10)    yes
O4 . Dy1 . O11 . 73.34(10)    yes
O5 . Dy1 . O11 . 134.73(10)    yes
O6 . Dy1 . O8 . 128.91(9)    yes
O6 . Dy1 . O9 . 85.43(10)    yes
O8 . Dy1 . O9 . 51.04(9)    yes
O6 . Dy1 . O11 . 78.26(9)    yes
O8 . Dy1 . O11 . 151.76(9)    yes
O9 . Dy1 . O11 . 139.21(10)    yes
Br1 . Zn1 . N1 . 111.45(8)    yes
Br1 . Zn1 . N2 . 105.56(9)    yes
N1 . Zn1 . N2 . 94.98(11)    yes
Br1 . Zn1 . O1 . 98.81(7)    yes
N1 . Zn1 . O1 . 86.89(10)    yes
N2 . Zn1 . O1 . 152.89(11)    yes
Br1 . Zn1 . O2 . 97.07(7)    yes
N1 . Zn1 . O2 . 148.82(10)    yes
N2 . Zn1 . O2 . 89.01(11)    yes
O1 . Zn1 . O2 . 76.20(9)    yes
O3 . C1 . H11 . 108.8    no
O3 . C1 . H12 . 109.9    no
H11 . C1 . H12 . 110.1    no
O3 . C1 . H13 . 107.8    no
H11 . C1 . H13 . 110.1    no
H12 . C1 . H13 . 110.0    no
C3 . C2 . C7 . 121.9(3)    yes
C3 . C2 . O3 . 125.4(3)    yes
C7 . C2 . O3 . 112.7(3)    yes
C2 . C3 . C4 . 119.4(3)    yes
C2 . C3 . H31 . 120.7    no
C4 . C3 . H31 . 119.9    no
C3 . C4 . C5 . 120.3(3)    yes
C3 . C4 . H41 . 119.8    no
C5 . C4 . H41 . 119.9    no
C4 . C5 . C6 . 120.7(3)    yes
C4 . C5 . H51 . 120.0    no
C6 . C5 . H51 . 119.2    no
C5 . C6 . C7 . 119.8(3)    yes
C5 . C6 . C8 . 117.3(3)    yes
C7 . C6 . C8 . 122.9(3)    yes
C2 . C7 . C6 . 117.8(3)    yes
C2 . C7 . O1 . 118.4(3)    yes
C6 . C7 . O1 . 123.8(3)    yes
C6 . C8 . N1 . 127.1(3)    yes
C6 . C8 . H81 . 115.9    no
N1 . C8 . H81 . 117.0    no
C10 . C9 . N1 . 115.9(3)    yes
C10 . C9 . H91 . 108.3    no
N1 . C9 . H91 . 107.5    no
C10 . C9 . H92 . 107.9    no
N1 . C9 . H92 . 107.5    no
H91 . C9 . H92 . 109.6    no
C9 . C10 . C11 . 111.2(3)    yes
C9 . C10 . C20 . 111.5(3)    yes
C11 . C10 . C20 . 112.9(3)    yes
C9 . C10 . C21 . 105.9(3)    yes
C11 . C10 . C21 . 105.2(3)    yes
C20 . C10 . C21 . 109.8(3)    yes
C10 . C11 . N2 . 116.6(3)    yes
C10 . C11 . H111 . 107.8    no
N2 . C11 . H111 . 107.9    no
C10 . C11 . H112 . 107.7    no
N2 . C11 . H112 . 107.1    no
H111 . C11 . H112 . 109.5    no
C13 . C12 . N2 . 128.8(3)    yes
C13 . C12 . H121 . 115.4    no
N2 . C12 . H121 . 115.7    no
C12 . C13 . C14 . 123.8(3)    yes
C12 . C13 . C15 . 117.1(4)    yes
C14 . C13 . C15 . 119.0(4)    yes
C13 . C14 . C18 . 118.0(3)    yes
C13 . C14 . O2 . 123.5(3)    yes
C18 . C14 . O2 . 118.5(3)    yes
C13 . C15 . C16 . 121.7(4)    yes
C13 . C15 . H151 . 118.1    no
C16 . C15 . H151 . 120.2    no
C15 . C16 . C17 . 119.8(4)    yes
C15 . C16 . H161 . 119.5    no
C17 . C16 . H161 . 120.8    no
C16 . C17 . C18 . 119.9(4)    yes
C16 . C17 . H171 . 120.6    no
C18 . C17 . H171 . 119.4    no
C14 . C18 . C17 . 121.6(3)    yes
C14 . C18 . O4 . 113.6(3)    yes
C17 . C18 . O4 . 124.8(3)    yes
O4 . C19 . H191 . 110.5    no
O4 . C19 . H192 . 109.3    no
H191 . C19 . H192 . 108.1    no
O4 . C19 . H193 . 110.6    no
H191 . C19 . H193 . 109.2    no
H192 . C19 . H193 . 109.1    no
C10 . C20 . H201 . 108.9    no
C10 . C20 . H202 . 110.8    no
H201 . C20 . H202 . 108.9    no
C10 . C20 . H203 . 109.9    no
H201 . C20 . H203 . 109.5    no
H202 . C20 . H203 . 108.7    no
C10 . C21 . H213 . 108.8    no
C10 . C21 . H212 . 109.8    no
H213 . C21 . H212 . 108.6    no
C10 . C21 . H211 . 110.7    no
H213 . C21 . H211 . 109.4    no
H212 . C21 . H211 . 109.5    no
C23 . C22 . O5 . 128.1(3)    yes
C23 . C22 . H221 . 115.6    no
O5 . C22 . H221 . 116.3    no
C22 . C23 . C24 . 118.1(3)    yes
C22 . C23 . C28 . 121.4(3)    yes
C24 . C23 . C28 . 120.5(3)    yes
C23 . C24 . C25 . 120.4(3)    yes
C23 . C24 . H241 . 119.3    no
C25 . C24 . H241 . 120.3    no
C24 . C25 . C26 . 120.3(3)    yes
C24 . C25 . H251 . 119.5    no
C26 . C25 . H251 . 120.2    no
C25 . C26 . C27 . 120.1(3)    yes
C25 . C26 . H261 . 120.0    no
C27 . C26 . H261 . 119.9    no
C26 . C27 . C28 . 121.5(3)    yes
C26 . C27 . O7 . 124.4(3)    yes
C28 . C27 . O7 . 114.1(3)    yes
C27 . C28 . C23 . 117.2(3)    yes
C27 . C28 . O6 . 118.4(3)    yes
C23 . C28 . O6 . 124.4(3)    yes
O7 . C29 . H291 . 109.7    no
O7 . C29 . H292 . 108.8    no
H291 . C29 . H292 . 110.9    no
O7 . C29 . H293 . 107.9    no
H291 . C29 . H293 . 109.6    no
H292 . C29 . H293 . 109.9    no
C9 . N1 . Zn1 . 120.4(2)    yes
C9 . N1 . C8 . 115.7(3)    yes
Zn1 . N1 . C8 . 123.9(2)    yes
C11 . N2 . Zn1 . 123.1(2)    yes
C11 . N2 . C12 . 114.1(3)    yes
Zn1 . N2 . C12 . 122.8(3)    yes
O8 . N3 . O9 . 116.2(3)    yes
O8 . N3 . O10 . 121.6(3)    yes
O9 . N3 . O10 . 122.2(3)    yes
C7 . O1 . Zn1 . 121.5(2)    yes
C7 . O1 . Dy1 . 126.84(19)    yes
Zn1 . O1 . Dy1 . 108.25(9)    yes
C14 . O2 . Zn1 . 125.4(2)    yes
C14 . O2 . Dy1 . 125.4(2)    yes
Zn1 . O2 . Dy1 . 108.19(10)    yes
Dy1 . O3 . C1 . 126.0(2)    yes
Dy1 . O3 . C2 . 117.23(19)    yes
C1 . O3 . C2 . 116.6(3)    yes
Dy1 . O4 . C19 . 125.6(3)    yes
Dy1 . O4 . C18 . 116.8(2)    yes
C19 . O4 . C18 . 116.5(3)    yes
Dy1 . O5 . C22 . 130.6(2)    yes
C28 . O6 . Dy1 . 136.7(2)    yes
C29 . O7 . C27 . 117.3(3)    yes
Dy1 . O8 . N3 . 95.5(2)    yes
Dy1 . O9 . N3 . 97.1(2)    yes

loop_
 _geom_hbond_atom_site_label_D
 _geom_hbond_site_symmetry_D
 _geom_hbond_atom_site_label_H
 _geom_hbond_site_symmetry_H
 _geom_hbond_atom_site_label_A
 _geom_hbond_site_symmetry_A
 _geom_hbond_angle_DHA
 _geom_hbond_distance_DH
 _geom_hbond_distance_HA
 _geom_hbond_distance_DA
 _geom_hbond_publ_flag
C1 . H11 . O6 . 130.33(11) 0.944 2.519 3.212(7)    yes
C8 . H81 . O8 2_656 160.12(10) 0.922 2.543 3.425(7)    yes
C11 . H112 . O10 8_545 149.16(12) 0.964 2.482 3.346(7)    yes
C17 . H171 . C31 4_656 145.1(5) 0.923 2.592 3.391(7)    yes
C19 . H191 . O6 . 122.77(13) 0.948 2.464 3.082(7)    yes
C19 . H191 . O7 . 169.06(14) 0.948 2.403 3.339(7)    yes
C24 . H241 . O10 2_666 145.51(11) 0.925 2.571 3.374(7)    yes


_iucr_refine_instruction_details_constraints
;
#
# Punched on 09/11/12 at 15:27:56
#
#LIST     12                                                                    
BLOCK SCALE X'S, U'S 
RIDE C(30,X'S) C(31,X'S) 
RIDE C(30,U'S) C(31,U'S) 
RIDE C   (   1,X'S) H   (  11,X'S) H   (  12,X'S) H   (  13,X'S) 
RIDE C   (   3,X'S) H   (  31,X'S) 
RIDE C   (   4,X'S) H   (  41,X'S) 
RIDE C   (   5,X'S) H   (  51,X'S) 
RIDE C   (   8,X'S) H   (  81,X'S) 
RIDE C   (   9,X'S) H   (  91,X'S) H   (  92,X'S) 
RIDE C   (  11,X'S) H   ( 112,X'S) H   ( 111,X'S) 
RIDE C   (  12,X'S) H   ( 121,X'S) 
RIDE C   (  15,X'S) H   ( 151,X'S) 
RIDE C   (  16,X'S) H   ( 161,X'S) 
RIDE C   (  17,X'S) H   ( 171,X'S) 
RIDE C   (  19,X'S) H   ( 191,X'S) H   ( 192,X'S) H   ( 193,X'S) 
RIDE C   (  20,X'S) H   ( 201,X'S) H   ( 202,X'S) H   ( 203,X'S) 
RIDE C   (  21,X'S) H   ( 211,X'S) H   ( 212,X'S) H   ( 213,X'S) 
RIDE C   (  22,X'S) H   ( 221,X'S) 
RIDE C   (  24,X'S) H   ( 241,X'S) 
RIDE C   (  25,X'S) H   ( 251,X'S) 
RIDE C   (  26,X'S) H   ( 261,X'S) 
RIDE C   (  29,X'S) H   ( 291,X'S) H   ( 292,X'S) H   ( 293,X'S) 
END                                                                             
;


_iucr_refine_instruction_details_restraints
;
#
# Punched on 09/11/12 at 15:27:56
#
#LIST     16                                                                    
NO 
REM   HREST   START (DO NOT REMOVE THIS LINE) 
REM   HREST   END (DO NOT REMOVE THIS LINE) 
END                                                                             
;
